# Supplementary material for: Neoadjuvant nivolumab plus ipilimumab in resectable non-small cell lung cancer
Source: PubMed Central journal article supplement — J Immunother Cancer. 2020 Sep 13;8(2):e001282. doi: 10.1136/jitc-2020-001282 (PMC7488786; doi:10.1136/jitc-2020-001282), 2020-09-13
Supplement: jitc-2020-001282supp002.pdf [file jitc-2020-001282supp002.pdf]

## Supplemental Figure 1

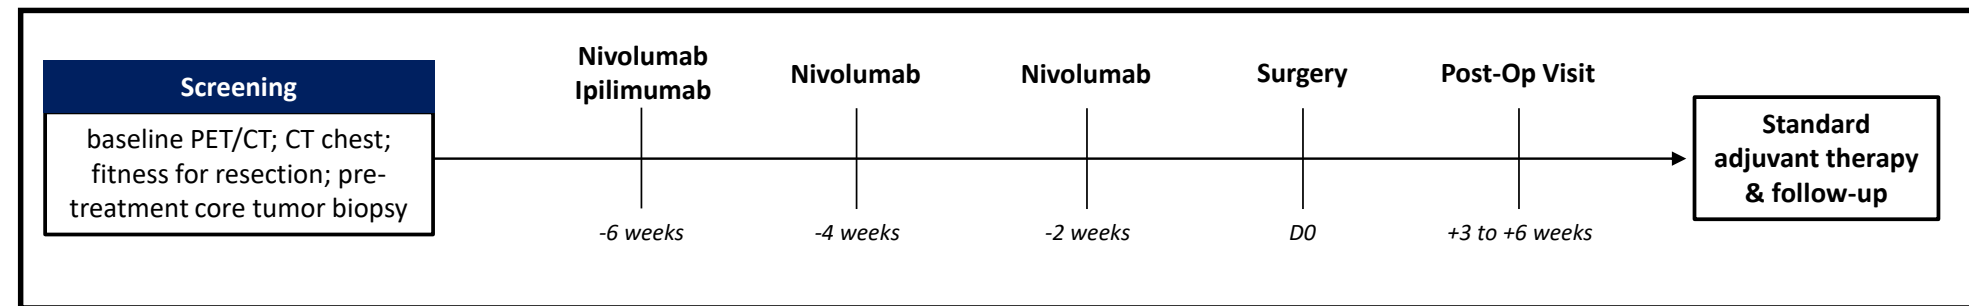

**Supplemental Figure 1: Study schema for neoadjuvant nivolumab plus ipilimumab in resectable NSCLC (NCT02259621).** Patients with surgically resectable AJCC TNM 7<sup>th</sup> edition stage IB ( $\geq 4$ cm) – IIIA histologically confirmed non-small cell lung cancer (NSCLC) were eligible for inclusion. Nivolumab 3mg/kg IV was given together with ipilimumab 1 mg/kg IV 6 weeks prior to planned resection (D0). Nivolumab 3 mg/kg was given again at approximately 4 and 2 weeks prior to resection. Blood for correlative analyses was drawn pre-treatment, with each dose of neoadjuvant therapy, prior to surgery, and post-operatively. AJCC TNM: American Joint Committee on Cancer Tumor Node Metastases; D0: day 0 (day of surgery); NSCLC: non-small cell lung cancer IV: intravenous.
