# Supplementary material for: Neoadjuvant nivolumab plus ipilimumab in resectable non-small cell lung cancer
Source: PubMed Central journal article supplement — J Immunother Cancer. 2020 Sep 13;8(2):e001282. doi: 10.1136/jitc-2020-001282 (PMC7488786; doi:10.1136/jitc-2020-001282), 2020-09-13
Supplement: jitc-2020-001282supp003.pdf [file jitc-2020-001282supp003.pdf]

## Supplemental Figure 2

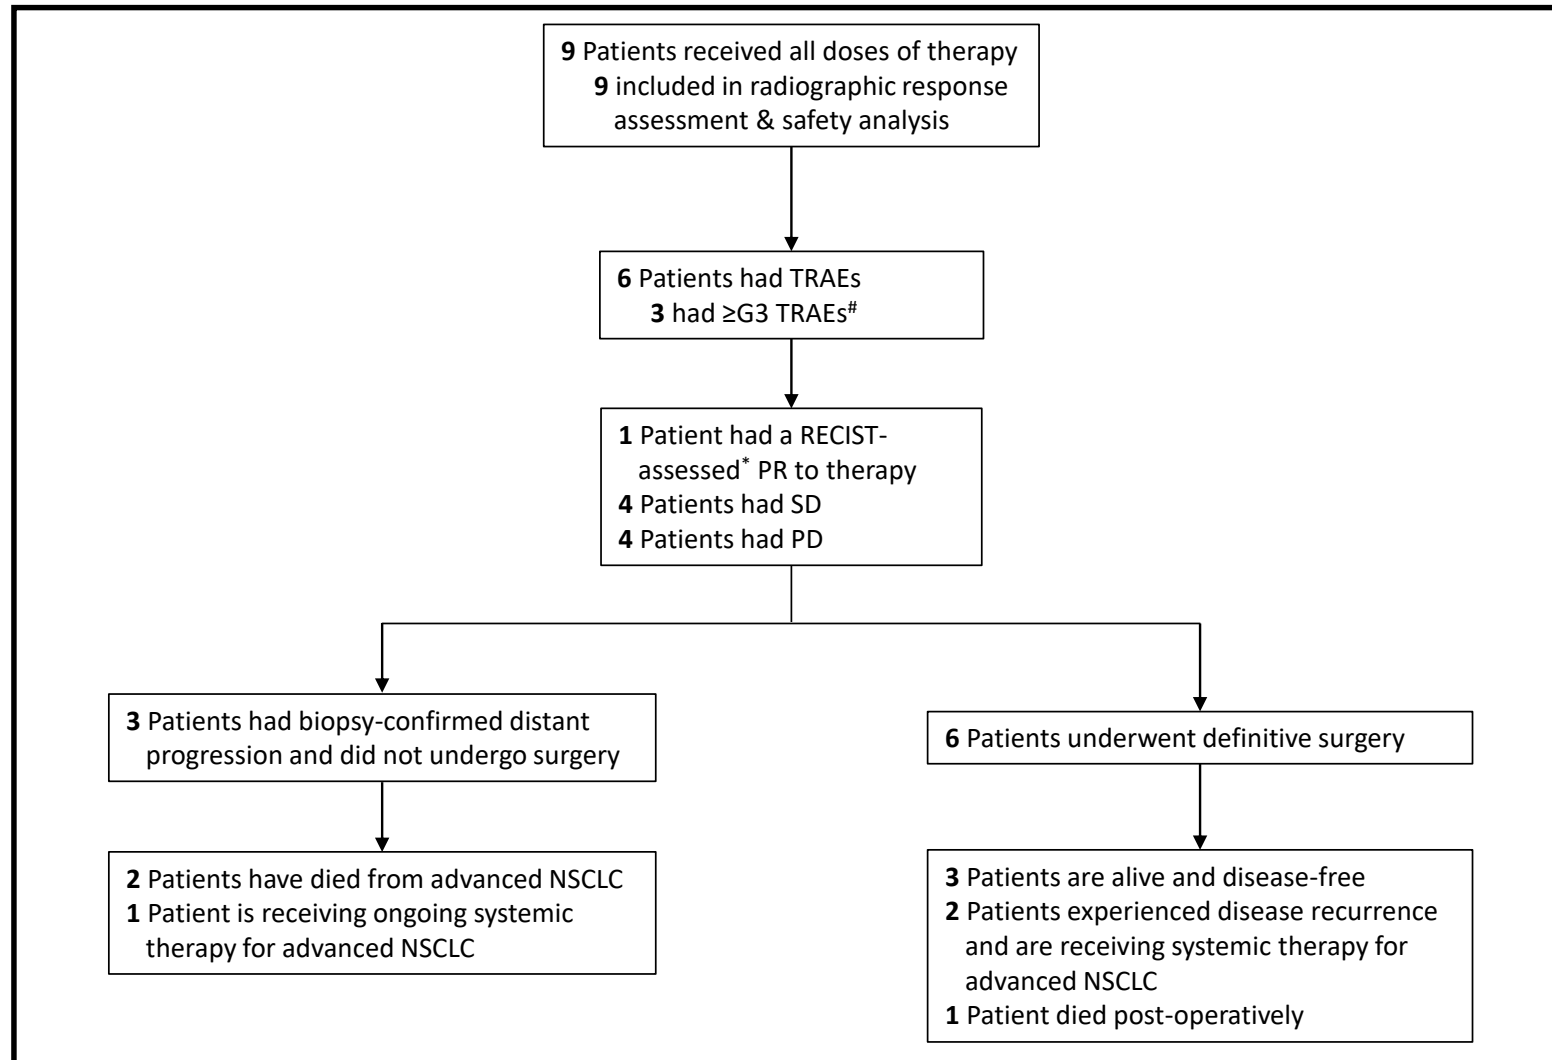

**Supplemental Figure 2: Patient flow chart of clinical outcomes**

#One G5 TRAE (ARDS) coded as “possibly-related” TRAE but suspected to be more likely related to post-surgical complication. All other TRAEs were G3. \*all radiographic RECIST assessments were unconfirmed, as only one post-neoadjuvant treatment imaging assessment was made prior to surgical resection. ARDS: acute respiratory distress syndrome; G: grade; NSCLC: non-small cell lung cancer; PD: progressive disease; PR: partial response; RECIST: response evaluation criteria in solid tumors; SD: stable disease.
